# Supplementary material for: Telemonitoring of daily activities compared to the six-minute walk test further completes the puzzle of oximetry-guided interventions
Source: PubMed Central journal article supplement (PMC8367992; doi:10.1038/s41598-021-96060-w), 2021-08-16
Supplement: 41598_2021_96060_MOESM1_ESM.pdf [file 41598_2021_96060_MOESM1_ESM.pdf]

# Telemonitoring of daily activities compared to the six-minute walk test further completes the puzzle of oximetry-guided interventions

Santos CD, Santos AF, das Neves RC, Ribeiro RM, Rodrigues F, Caneiras C, Spruit MA and Bárbara C

**Catarina Duarte Santos, MSc** \* [fisiocsantos@gmail.com](mailto:fisiocsantos@gmail.com)

Instituto de Saúde Ambiental, Faculdade de Medicina, Universidade de Lisboa, Portugal

Unidade de Reabilitação Respiratória, Hospital Pulido Valente, Centro Hospitalar Universitário Lisboa Norte, Portugal

**Ana Filipe Santos, Dr.**

Unidade de Reabilitação Respiratória, Hospital Pulido Valente, Centro Hospitalar Universitário Lisboa Norte, Portugal

**Rui César das Neves, Dr.**

CAST - Consultoria e Aplicações em Sistemas e Tecnologia, Lda., Portugal

**Ruy M. Ribeiro, PhD**

Laboratório de Biomatemática, Instituto de Saúde Ambiental, Faculdade de Medicina da Universidade de Lisboa, Portugal

**Fátima Rodrigues, PhD**

Instituto de Saúde Ambiental, Faculdade de Medicina, Universidade de Lisboa, Portugal

Unidade de Reabilitação Respiratória, Hospital Pulido Valente, Centro Hospitalar Universitário Lisboa Norte, Portugal

**Cátia Caneiras, PhD**

Laboratório de Microbiologia na Saúde Ambiental (EnviHealthMicroLab), Instituto de Saúde Ambiental, Faculdade de Medicina, Universidade de Lisboa, Portugal

Instituto de Medicina Preventiva e Saúde Pública, Faculdade de Medicina, Universidade de Lisboa, Portugal

Healthcare Department, Nippon Gases Portugal

**Martijn A. Spruit, PhD**

Department of Research & Development, CIRO, 6085 NM Horn, The Netherlands

Department of Respiratory Medicine, Maastricht University Medical Centre, Faculty of Health, Medicine and Life Sciences, NUTRIM School of Nutrition and Translational Research in Metabolism, 6229 HX Maastricht, The Netherlands

**Cristina Bárbara, PhD**

Instituto de Saúde Ambiental, Faculdade de Medicina, Universidade de Lisboa, Portugal

Serviço de Pneumologia, Centro Hospitalar Universitário Lisboa Norte, Portugal

**Table S1 – Comorbidities per chronic lung disease**

|                                     | <b>Total</b> | <b>COPD</b> | <b>ILD</b> | <b>Asthma</b> | <b>Bronchiectasis</b> | <b>Other</b> |
|-------------------------------------|--------------|-------------|------------|---------------|-----------------------|--------------|
|                                     | N = 100      | N = 41      | N = 22     | N = 15        | N = 10                | N = 12       |
|                                     | %            | n (%)       | n (%)      | n (%)         | n (%)                 | n (%)        |
| <b>Respiratory Comorbidities</b>    |              |             |            |               |                       |              |
| Bronchiectasis                      | 28.0         | 14 (34.1)   | 3 (13.6)   | 8 (53.3)      | 0 (0.0)               | 3 (25.0)     |
| Chronic Respiratory Failure         | 26.0         | 13 (31.7)   | 6 (27.3)   | 1 (6.7)       | 2 (20.0)              | 4 (33.3)     |
| Pulmonary Fibrosis                  | 20.0         | 1 (2.4)     | 17 (77.3)  | 1 (6.7)       | 0 (0.0)               | 1 (8.3)      |
| Rhinitis                            | 13.0         | 4 (9.8)     | 2 (9.1)    | 3 (20.0)      | 1 (10.0)              | 3 (25.0)     |
| Tuberculosis Sequelae               | 12.0         | 5 (12.2)    | 0 (0.0)    | 1 (6.7)       | 5 (50.0)              | 1 (8.3)      |
| Sleep Apnea                         | 9.0          | 4 (9.8)     | 2 (9.1)    | 1 (6.7)       | 0 (0.0)               | 2 (16.7)     |
| Lung Cancer                         | 7.0          | 3 (7.3)     | 0 (0.0)    | 0 (0.0)       | 0 (0.0)               | 4 (33.3)     |
| Pulmonary Hypertension              | 7.0          | 4 (9.8)     | 0 (0.0)    | 1 (6.7)       | 0 (0.0)               | 2 (16.7)     |
| <b>Cardiovascular Comorbidities</b> |              |             |            |               |                       |              |
| Arterial Hypertension               | 56.0         | 23 (56.1)   | 7 (31.8)   | 11 (73.3)     | 8 (80.0)              | 7 (58.3)     |
| Dyslipidaemia                       | 40.0         | 17 (41.5)   | 11 (50.0)  | 5 (33.3)      | 3 (30.0)              | 4 (33.3)     |
| Arrhythmias                         | 11.0         | 6 (14.6)    | 3 (13.6)   | 2 (13.3)      | 0 (0.0)               | 0 (0.0)      |
| Coronary Heart Disease              | 9.0          | 4 (9.8)     | 2 (9.1)    | 2 (13.3)      | 1 (10.0)              | 0 (0.0)      |
| Peripheral Arterial Disease         | 9.0          | 5 (12.2)    | 2 (9.1)    | 2 (13.3)      | 0 (0.0)               | 0 (0.0)      |
| <b>Other Comorbidities</b>          |              |             |            |               |                       |              |
| Anxiety or Depression               | 29.0         | 11 (26.8)   | 8 (36.4)   | 6 (40.0)      | 2 (20.0)              | 2 (16.7)     |
| Gastric Disease                     | 19.0         | 5 (12.2)    | 6 (27.3)   | 1 (6.7)       | 4 (40.0)              | 3 (25.0)     |
| Diabetic                            | 18.0         | 6 (14.6)    | 7 (31.8)   | 3 (20.0)      | 2 (20.0)              | 0 (0.0)      |
| Gastroesophageal Reflux Disease     | 15.0         | 1 (2.4)     | 6 (27.3)   | 4 (26.7)      | 1 (10.0)              | 3 (25.0)     |
| Obesity                             | 12.0         | 5 (12.2)    | 4 (18.2)   | 2 (13.3)      | 1 (10.0)              | 0 (0.0)      |
| Rheumatoid Disease                  | 11.0         | 4 (9.8)     | 4 (18.2)   | 1 (6.7)       | 1 (10.0)              | 1 (8.3)      |
| Thyroid Disease                     | 10.0         | 2 (4.9)     | 2 (9.1)    | 2 (13.3)      | 2 (20.0)              | 2 (16.7)     |
| Osteoporosis                        | 7.0          | 1 (2.4)     | 3 (13.6)   | 1 (6.7)       | 0 (0.0)               | 2 (16.7)     |

COPD: Chronic Obstructive Pulmonary Disease; ILD: Interstitial Lung Disease; Other: post-thoracic surgery status, Lung Cancer,

Tuberculosis sequelae, Connective Tissue Disease and Pulmonary Ossification

**Table S2 – Six-minute walk test outcomes per chronic lung disease**

|                                                                    | <b>Total</b><br>N = 100 | <b>COPD</b><br>N = 41 | <b>ILD</b><br>N = 22 | <b>Asthma</b><br>N = 15 | <b>Bronchiectasis</b><br>N = 10 | <b>Other</b><br>N = 12 |
|--------------------------------------------------------------------|-------------------------|-----------------------|----------------------|-------------------------|---------------------------------|------------------------|
| <b>6MWT</b>                                                        |                         |                       |                      |                         |                                 |                        |
| 6MWD (m; mean ± SD)                                                | 328 ± 114               | 330 ± 127             | 291 ± 104            | 341 ± 112               | 311 ± 88                        | 389 ± 91               |
| nadir SpO <sub>2</sub> (%; mean ± SD)                              | 86.2 ± 6.2              | 85.4 ± 5.7            | 83.3 ± 7.4           | 89.4 ± 3.5              | 88.6 ± 7.5                      | 88.2 ± 4.9             |
| peak HR (%; mean ± SD)                                             | 71.2 ± 11.9             | 74.3 ± 11.1           | 69.4 ± 11.4          | 69.1 ± 12.2             | 72.5 ± 18.1                     | 65.8 ± 6.5             |
| activity intensity (MET; mean ± SD)                                | 2.6 ± 0.5               | 2.6 ± 0.6             | 2.4 ± 0.5            | 2.6 ± 0.5               | 2.5 ± 0.4                       | 2.9 ± 0.4              |
| number of pauses ( <i>n</i> ; median; IQR)                         | 0 (0 – 0)               | 0 (0 – 0)             | 0 (0 – 1)            | 0 (0 – 0)               | 0 (0 – 0)                       | 0 (0 – 0)              |
| number of periods SpO <sub>2</sub> < 90% ( <i>n</i> ; median; IQR) | 1 (0 – 1)               | 1 (1 – 1)             | 1 (0 – 2)            | 1 (0 – 1)               | 0 (0 – 1)                       | 1 (0 – 2)              |

COPD: Chronic Obstructive Pulmonary Disease; ILD: Interstitial Lung Disease; Other: post-thoracic surgery status, Lung Cancer, Tuberculosis sequelae, Connective Tissue Disease and Pulmonary Ossification; 6MWT: six-minute walk test; 6MWD: six-minute walk distance; SD: standard-deviation; nadir SpO<sub>2</sub>: lowest peripheral oxygen saturation detected; HR: heart rate; MET: metabolic equivalent of task; IQR: interquartile range

**Table S3 – SMARTREAB telemonitoring outcomes per chronic lung disease**

|                                                        | <b>Total</b><br>N = 100 | <b>COPD</b><br>N = 41 | <b>ILD</b><br>N = 22 | <b>Asthma</b><br>N = 15 | <b>Bronchiectasis</b><br>N = 10 | <b>Other</b><br>N = 12 |
|--------------------------------------------------------|-------------------------|-----------------------|----------------------|-------------------------|---------------------------------|------------------------|
| <b><i>SMARTREAB telemonitoring</i></b>                 |                         |                       |                      |                         |                                 |                        |
| nadir SpO <sub>2</sub> (%; mean ± SD)                  | 80.0 ± 8.2              | 81 ± 8                | 75 ± 8               | 77 ± 9                  | 79 ± 6                          | 82 ± 8                 |
| peak HR (%; mean ± SD)                                 | 80.6 ± 11.2             | 80.3 ± 12.0           | 78.0 ± 10.4          | 82.6 ± 10.7             | 84.0 ± 11.5                     | 80.7 ± 10.4            |
| activity intensity (MET; mean ± SD)                    | 2.9 ± 0.7               | 2.9 ± 0.7             | 2.9 ± 0.7            | 2.9 ± 0.4               | 2.6 ± 0.6                       | 3.5 ± 0.8              |
| daily episodes SpO <sub>2</sub> < 90% (n; median; IQR) | 6 (2 – 6)               | 8 (2 – 12)            | 10 (4 – 21)          | 3 (1 – 7)               | 4 (2 – 8)                       | 2 (0 – 15)             |
| longest period SpO <sub>2</sub> < 90% (min; mean ± SD) | 28 ± 37                 | 28 ± 36               | 33 ± 28              | 26 ± 45                 | 19 ± 32                         | 29 ± 49                |

COPD: Chronic Obstructive Pulmonary Disease; ILD: Interstitial Lung Disease; Other: post-thoracic surgery status, Lung Cancer, Tuberculosis sequelae, Connective Tissue Disease and Pulmonary Ossification; nadir SpO<sub>2</sub>: lowest peripheral oxygen saturation detected; SD: standard-deviation; HR: heart rate; MET: metabolic equivalent of task; IQR: interquartile range
